# Supplementary material
Source: Copernicus journal article supplement (doi:10.5194/egusphere-2026-1976)
Supplement: Supplementary file 1 [file egusphere-2026-1976-supplement.pdf]

# Supplementary Material

## **Variability of methane content in bottom waters of 46 African lakes**

Alberto V. Borges, Cédric Morana, Loris Deirmendjian, William Okello, Patrick Omeja,  
Mwapu Isumbiso, Jean-Pierre Descy, Steven Bouillon

### **Table of contents**

Figures S1 to S11

Tables S1 to S4

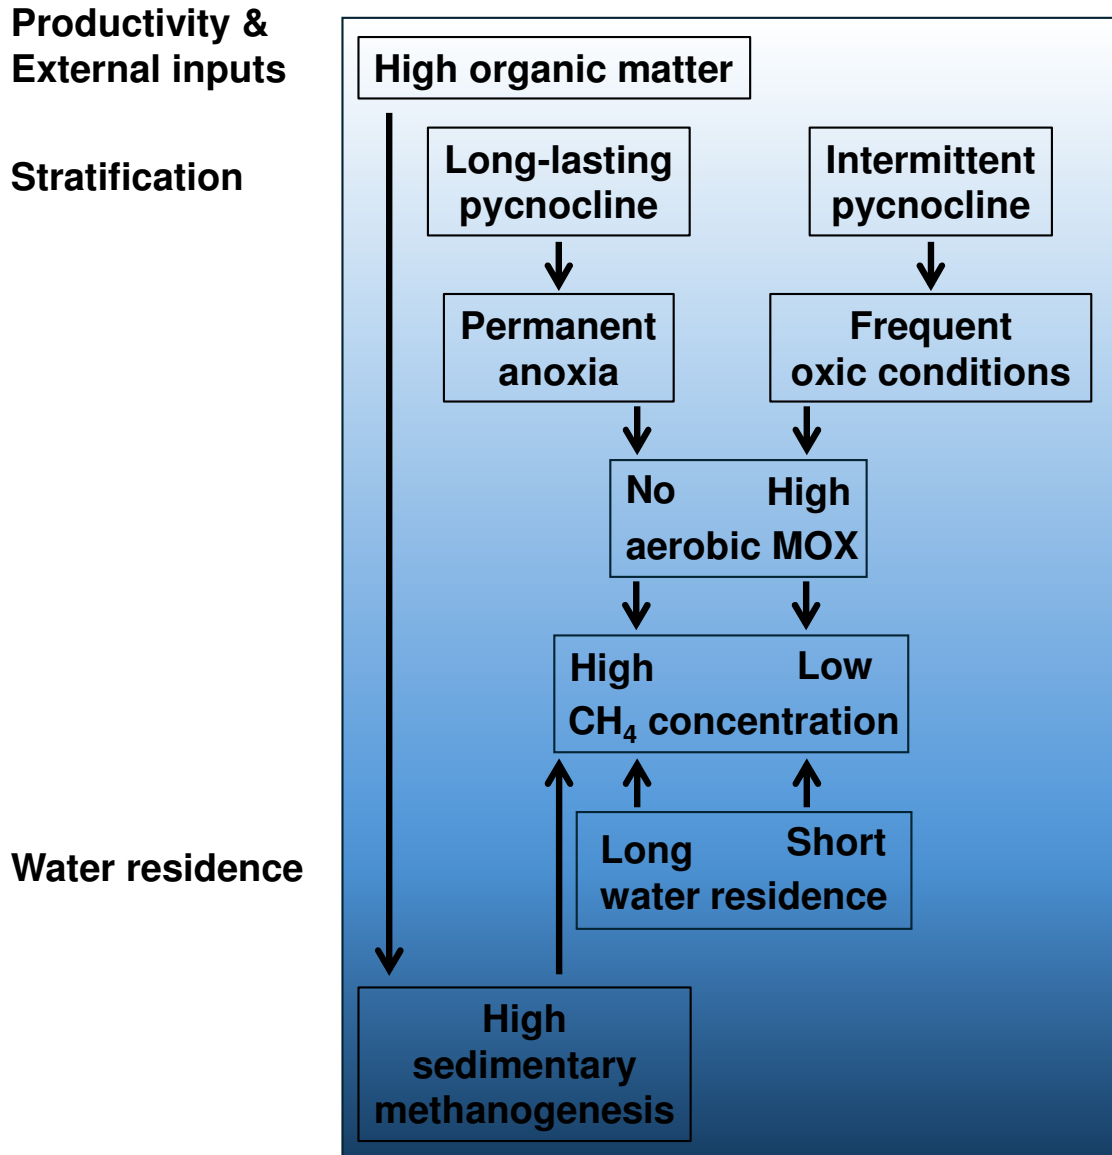

**Figure S1:** Summary of processes that affect bottom water CH<sub>4</sub> dissolved concentration in lakes, based on Juutinen et al. (2009), Kankaala et al. (2013), and Vachon et al. (2019).

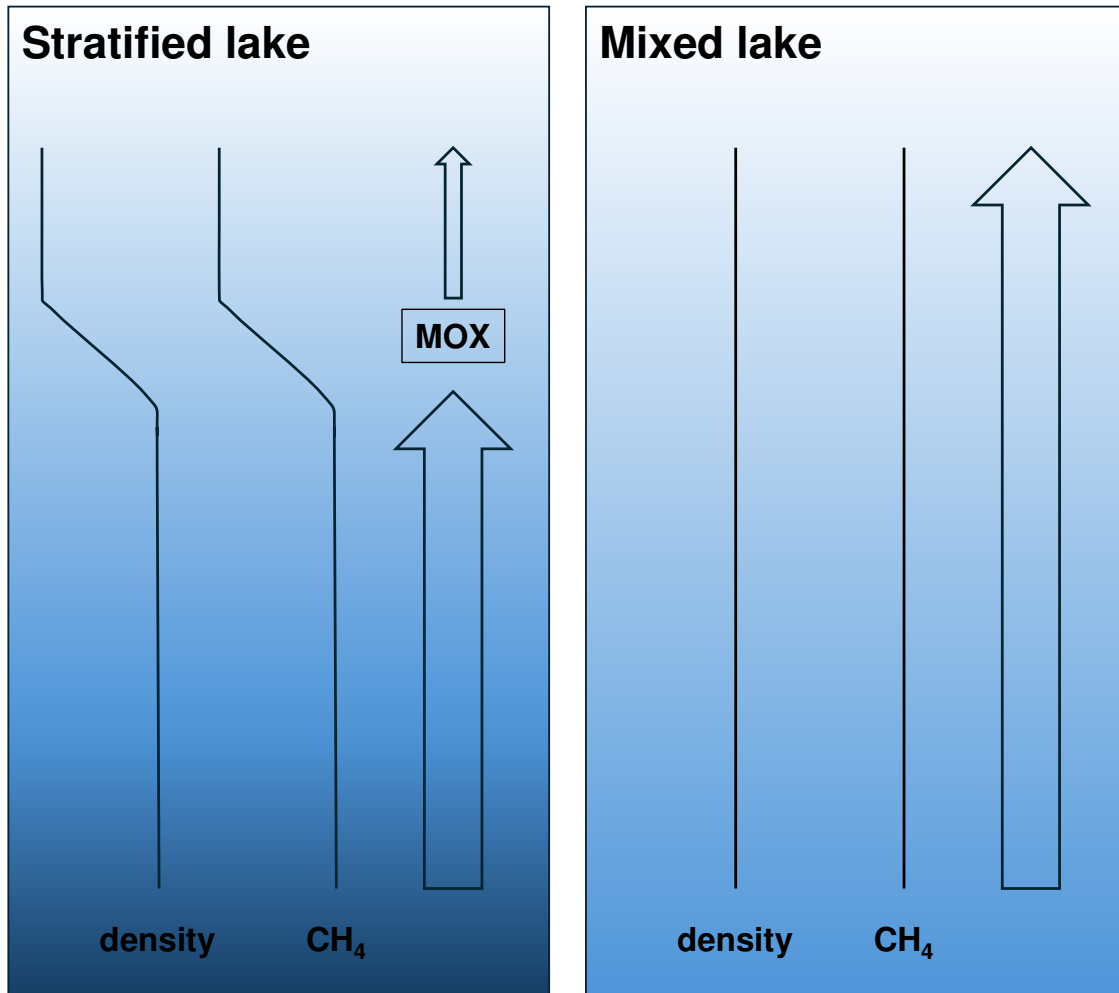

**Figure S2:** Schematic representation of the impact of stratification and vertical mixing on vertical distribution of density and dissolved CH<sub>4</sub> (solid lines), based on Juutinen et al. (2009), Kankaala et al. (2013), and Vachon et al. (2019). MOX = methane oxidation.

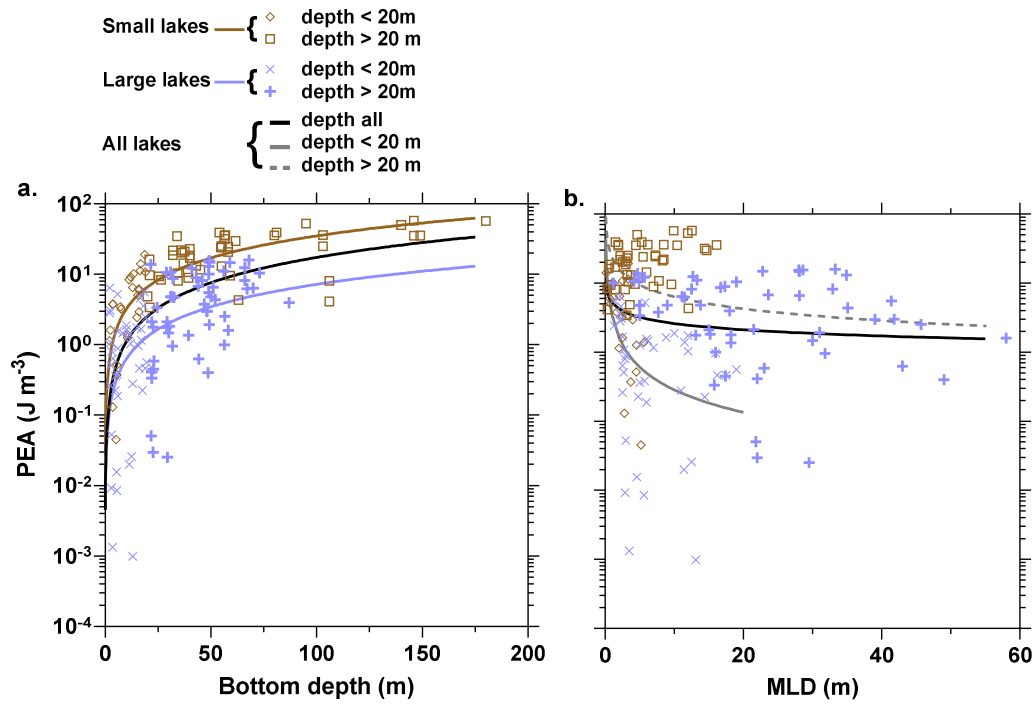

**Figure S3:** Potential energy anomaly (PEA in  $\text{J m}^{-3}$ ) versus bottom depth (m) (a) and mixed layer depth (MLD in m) (b) in 46 African lakes (Figure 1) separated into large (surface area  $> 100\text{km}^2$ ) and small (surface area  $< 100\text{km}^2$ ) lakes, and data points were further separated into shallow (depth  $< 20\text{m}$ ) and deep sites (depth  $> 20\text{m}$ ). The solid lines show the linear regressions (details in Table S1).

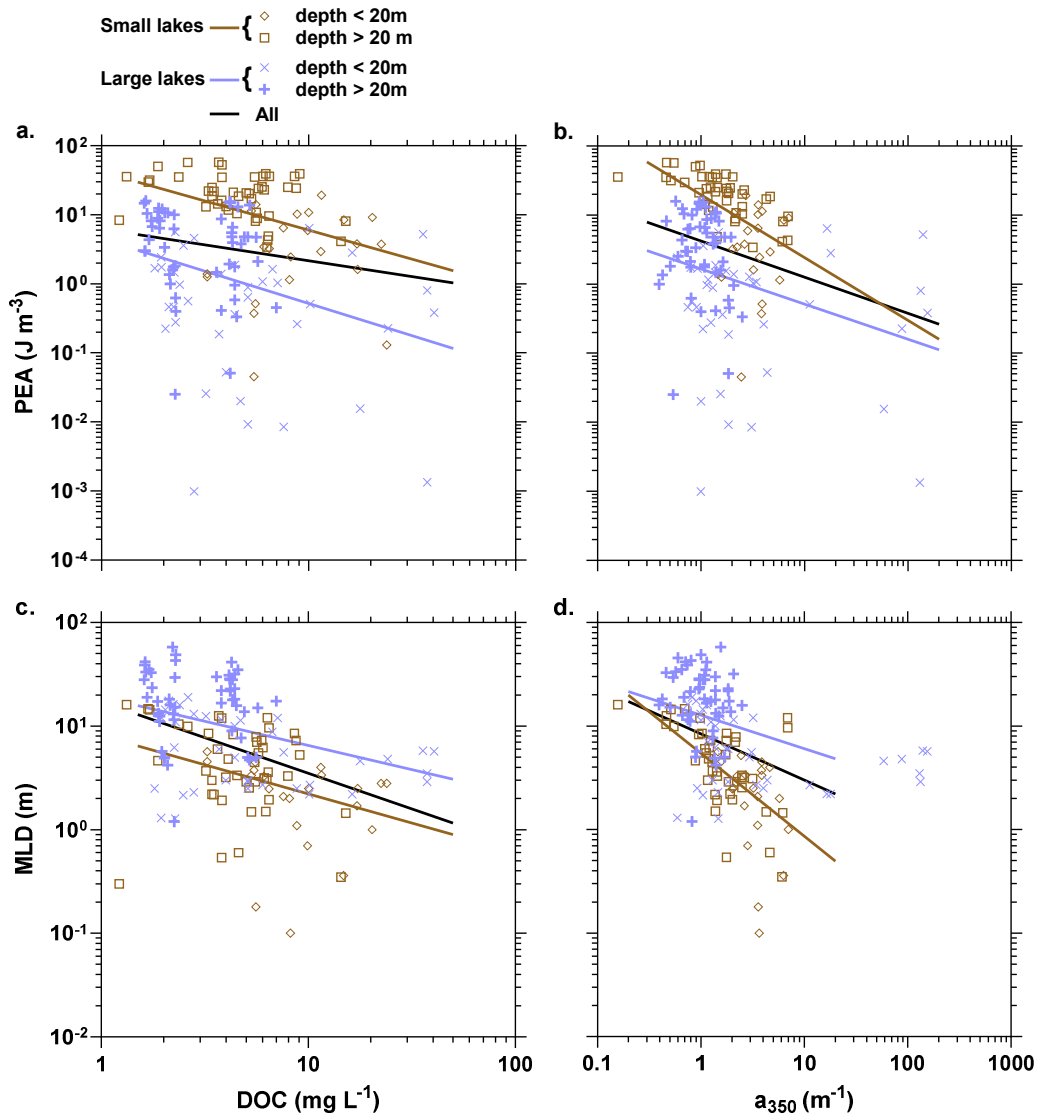

**Figure S4** Potential energy anomaly (PEA in  $\text{J m}^{-3}$ ) and mixed layer depth (MLD in m) *versus* dissolved organic carbon concentration (DOC in  $\text{mg L}^{-1}$ ) (a,c) and coloured dissolved organic matter absorbance at 350 nm ( $a_{350}$  in  $\text{m}^{-1}$ ) in 46 African lakes (Figure 1) separated into large (surface area >  $100\text{km}^2$ ) and small (surface area <  $100\text{km}^2$ ) lakes, and data points were further separated into shallow (depth < 20m) and deep sites (depth > 20m). The solid lines show the linear regressions (details in Table S1).

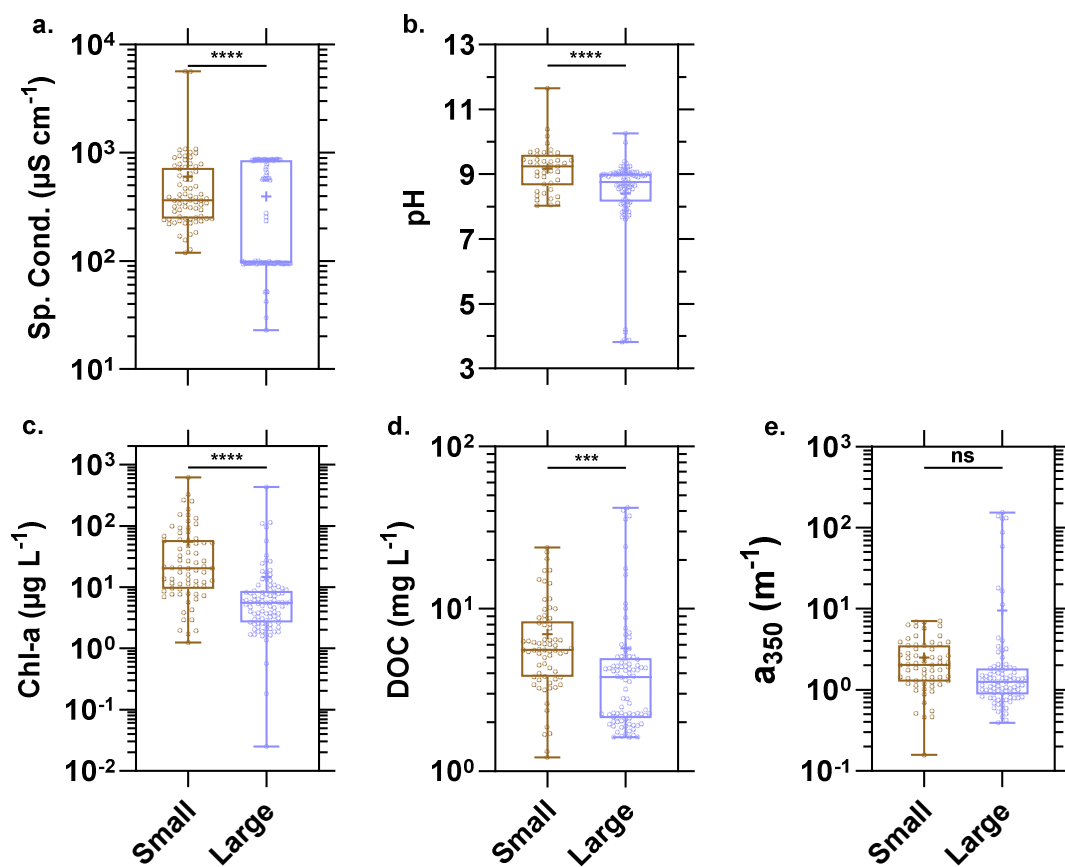

**Figure S5:** Box plots of specific conductivity (Sp. Cond. In  $\mu\text{S cm}^{-1}$ ) (a), pH (b), Chlorophyll-a concentration ( $\mu\text{g L}^{-1}$ ) (c), dissolved organic carbon concentration (DOC in  $\text{mg L}^{-1}$ ) (d), and coloured dissolved organic matter absorbance at 350 nm ( $a_{350}$  in  $\text{m}^{-1}$ ) (e) in surface waters of 46 African lakes (Fig. 1) separated into large (surface area  $> 100\text{km}^2$ ) and small (surface area  $< 100\text{km}^2$ ) systems. Box indicates the inter-quartile range, horizontal line the median, cross the mean, bars the maximum and minimum values. Results of the statistical comparison of means are summarized at the top of the figures and detailed in Table S2.

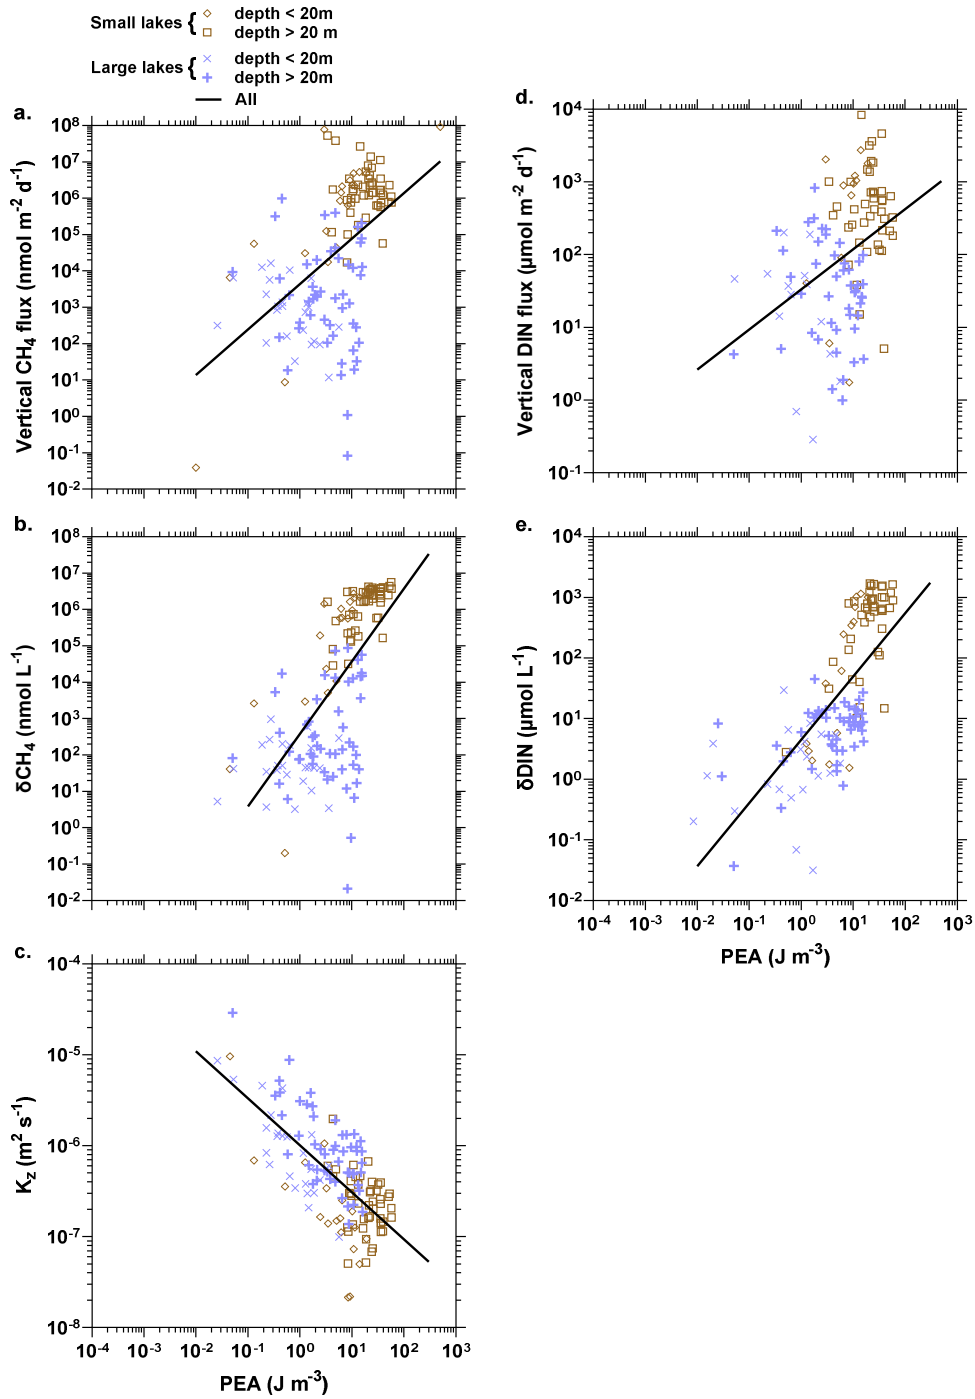

**Figure S6:** Vertical flux into surface waters across the thermocline of  $\text{CH}_4$  ( $\text{nmol L}^{-1} \text{d}^{-1}$ ) (a) and dissolved inorganic nitrogen (DIN) ( $\mu\text{mol m}^{-2} \text{d}^{-1}$ ) (d), surface-bottom concentration gradient of  $\text{CH}_4$  ( $\delta\text{CH}_4$  in  $\text{nmol L}^{-1}$ ) (b) and DIN ( $\delta\text{DIN}$  in  $\mu\text{mol L}^{-1}$ ) (e), and turbulent diffusion coefficient ( $K_z$  in  $\text{m}^2 \text{s}^{-1}$ ) (c) versus potential energy anomaly (PEA in  $\text{J m}^{-3}$ ) in 46 African lakes (Figure 1) separated into large (surface area >  $100\text{km}^2$ ) and small (surface area <  $100\text{km}^2$ ) systems, and data points were further separated into shallow (depth < 20m) and deep sites (depth > 20m). The solid lines show the linear regressions (details in Table S2).

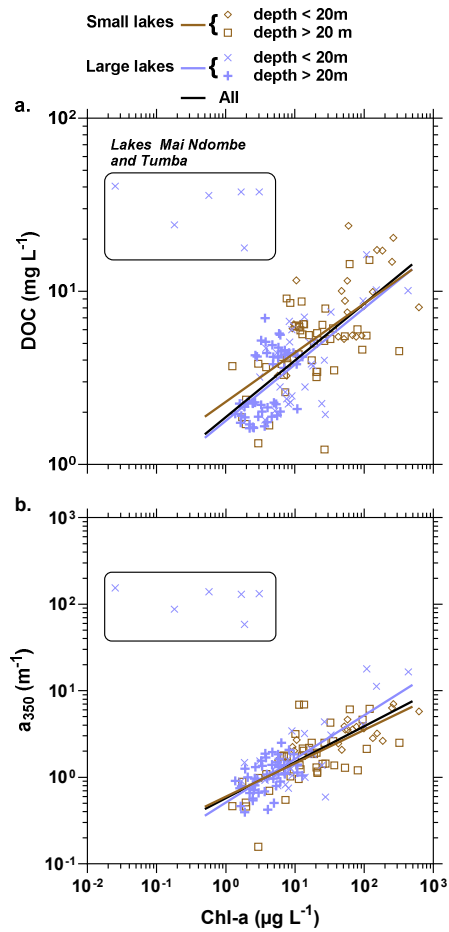

**Figure S7** Dissolved organic carbon concentration (DOC in  $\text{mg L}^{-1}$ ) (a) and coloured dissolved organic matter absorbance at 350 nm ( $a_{350}$  in  $\text{m}^{-1}$ ) (b) versus Chlorophyll-a concentration (Chl-a in  $\mu\text{g L}^{-1}$ ) in 46 African lakes (Figure 1) separated into large (surface area >  $100\text{km}^2$ ) and small (surface area <  $100\text{km}^2$ ) lakes, and data points were further separated into shallow (depth < 20m) and deep sites (depth > 20m). The solid lines show the linear regressions (details in Table S1). Box frame indicates data in Lakes Mai Ndombe and Tumba that drain flooded forest in the Congo basin and are very humic (data excluded from linear regression models).

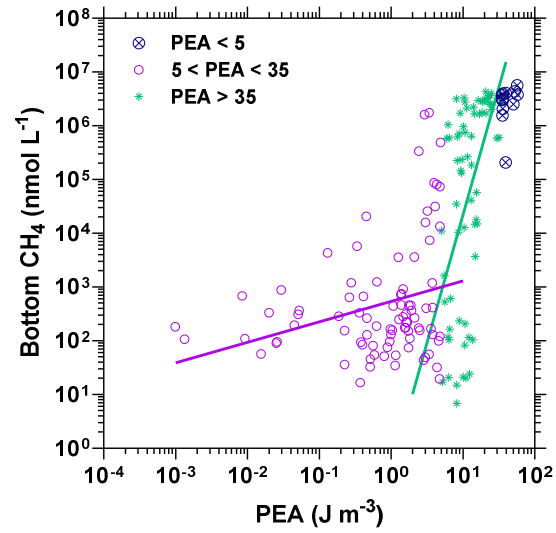

**Figure S8:** Dissolved CH<sub>4</sub> concentration in bottom waters (nmol L<sup>-1</sup>) versus potential energy anomaly (PEA in J m<sup>-3</sup>) separated into three groups of PEA (PEA<5; 5<PEA<35; PEA>35) in 46 African lakes (Figure 1). The solid lines show the linear regressions (details in Table S2).

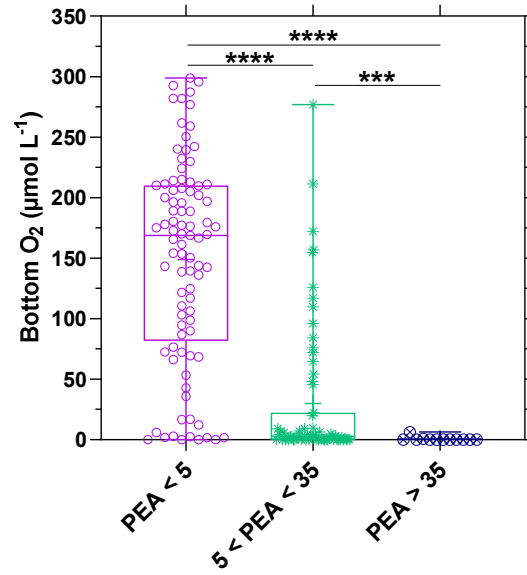

**Figure S9:** Box plots of bottom water O<sub>2</sub> concentration (µmol L<sup>-1</sup>) separated into three groups of potential energy anomaly (PEA in J m<sup>-3</sup>) (PEA<5; 5<PEA<35; PEA>35) in 46 African lakes (Figure 1). Box indicates the inter-quartile range, horizontal line the median, cross the mean, bars the maximum and minimum values. Results of the statistical comparison of means are summarized at the top of the figures and detailed in Table S4.

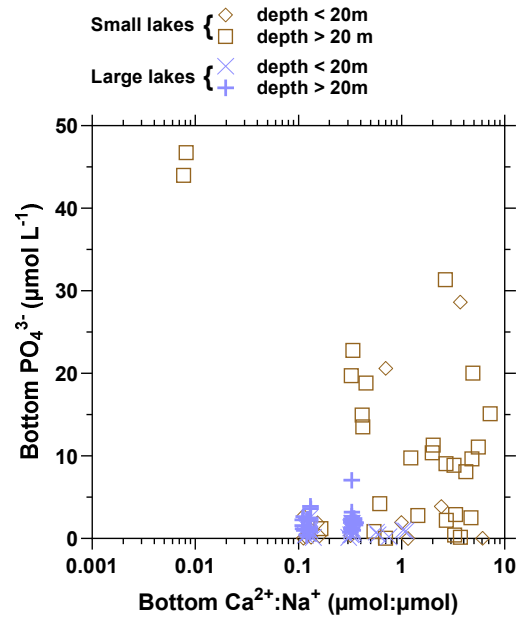

**Figure S10** Bottom water dissolved  $\text{PO}_4^{3-}$  concentration ( $\mu\text{mol L}^{-1}$ ) *versus* the  $\text{Ca}^{2+}:\text{Na}^+$  ratio ( $\mu\text{mol}:\mu\text{mol}$ ) in 46 African lakes (Figure 1) separated into large (surface area >  $100\text{km}^2$ ) and small (surface area <  $100\text{km}^2$ ) lakes, and data points were further separated into shallow (depth < 20m) and deep sites (depth > 20m). Linear regressions are detailed in Table S2.

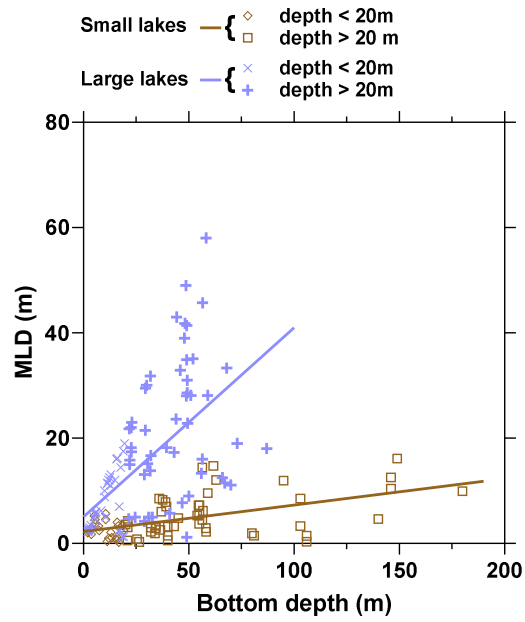

**Figure S11:** Mixed layer depth (MLD in m) versus bottom depth (m) in 46 African lakes (Figure 1) separated into large (surface area > 100km<sup>2</sup>) and small (surface area < 100km<sup>2</sup>) systems, and data points were further separated into shallow (depth < 20m) and deep sites (depth > 20m). The solid lines show the linear regressions (details in Table S2).

**Table S1:** Morphometric variables of 46 African lakes (Fig. 1) listed alphabetically, characterized as large (surface area (SA) > 100km<sup>2</sup>) and small (surface area < 100km<sup>2</sup>) systems, Latitude (°N), Longitude (°E), Elevation (Elev. In m), SA in km<sup>2</sup>, maximum effective length (MEL in km), maximum (max.) depth (in m), and number (n) of profiles (paired surface- and bottom-water CH<sub>4</sub> measurements).

| #  | Lake         | Type  | Latitude (°N) | Longitude (°E) | Elev. (m) | SA (km <sup>2</sup> ) | MEL (km) | Max. depth (m) | n  |
|----|--------------|-------|---------------|----------------|-----------|-----------------------|----------|----------------|----|
| 1  | Albert       | Large | 1.6286        | 30.8807        | 614       | 5,402                 | 175.3    | 58.0           | 9  |
| 2  | Bunyonyi     | Small | -1.2944       | 29.9190        | 1944      | 53.7                  | 7.6      | 39.4           | 2  |
| 3  | Edward       | Large | -0.3711       | 29.5653        | 911       | 2,253                 | 83.4     | 117.0          | 32 |
| 4  | George       | Large | -0.0010       | 30.2188        | 912       | 273                   | 22.3     | 3.0            | 4  |
| 5  | Kanyamukali  | Small | 0.4063        | 30.2362        | 1157      | 0.023                 | 0.20     | 13.5           | 2  |
| 6  | Kanyongo     | Small | 0.6809        | 30.2353        | 1555      | 0.12                  | 0.53     | 95.0           | 1  |
| 7  | Kasenda      | Small | 0.4319        | 30.2903        | 1256      | 0.072                 | 0.36     | 16.8           | 2  |
| 8  | Katanda      | Small | 0.4807        | 30.2630        | 1341      | 0.40                  | 0.79     | 146.0          | 2  |
| 9  | Katinda      | Small | -0.2211       | 30.1061        | 1039      | 0.44                  | 0.85     | 21.0           | 3  |
| 10 | Kayumba      | Small | -1.3388       | 29.7890        | 1891      | 1.5                   | 2.2      | 5.2            | 1  |
| 11 | Kiribwato    | Small | 0.4309        | 30.3238        | 1228      | 0.12                  | 0.62     | 10.6           | 2  |
| 12 | Kyamwanga    | Small | -0.1869       | 30.1454        | 1021      | 3.1                   | 2.4      | 43.0           | 1  |
| 13 | Kyanga       | Small | 0.4007        | 30.2339        | 1156      | 0.12                  | 0.51     | 54.7           | 2  |
| 14 | Kyashanduka  | Small | -0.2903       | 30.0500        | 1010      | 0.51                  | 1.0      | 2.0            | 1  |
| 15 | Lugembe      | Small | 0.4494        | 30.2811        | 1268      | 0.087                 | 0.45     | 19.0           | 2  |
| 16 | Lyantode     | Small | 0.4889        | 30.2799        | 1433      | 0.14                  | 0.52     | 180.0          | 1  |
| 17 | Mai Ndombe   | Large | -2.0702       | 18.3100        | 288       | 2,305                 | 84.1     | 6.2            | 4  |
| 18 | Mbajo        | Small | 0.4488        | 30.2745        | 1263      | 0.16                  | 0.56     | 58.3           | 2  |
| 19 | Mbalukira    | Small | -1.2192       | 29.0311        | 1617      | 1.52                  | 2.0      | 15.5           | 1  |
| 20 | Mbita        | Small | -1.2166       | 29.0276        | 1615      | 2.72                  | 3.5      | 26.5           | 2  |
| 21 | Mdichu       | Small | 0.4464        | 30.2701        | 1273      | 0.10                  | 0.40     | 34.3           | 2  |
| 22 | Mrambi       | Small | -0.2297       | 30.1056        | 1082      | 0.56                  | 0.95     | 20.0           | 2  |
| 23 | Mugamir      | Small | 0.4204        | 30.2867        | 1198      | 0.28                  | 0.71     | 55.2           | 2  |
| 24 | Mulehe       | Small | -1.2180       | 29.7223        | 1791      | 2.7                   | 3.5      | 5.6            | 2  |
| 25 | Murusi       | Small | 0.4269        | 30.2926        | 1223      | 0.23                  | 0.58     | 56.8           | 2  |
| 26 | Mutanda      | Small | -1.2166       | 29.6737        | 1878      | 23.3                  | 7.2      | 63.0           | 2  |
| 27 | Mwamba       | Small | 0.4617        | 30.2740        | 1301      | 0.42                  | 1.1      | 32.0           | 2  |
| 28 | Mwegenyi     | Small | 0.4894        | 30.2617        | 1397      | 0.37                  | 0.96     | 140.0          | 1  |
| 29 | Ndalaga      | Small | -1.2753       | 29.0085        | 1714      | 3.99                  | 3.7      | 21.0           | 1  |
| 30 | Nkugute      | Small | -0.3243       | 30.0993        | 1407      | 0.93                  | 1.4      | 55.0           | 2  |
| 31 | Nkuruba      | Small | 0.5173        | 30.3025        | 1512      | 0.027                 | 0.29     | 36.5           | 2  |
| 32 | Ntambi       | Small | 0.4093        | 30.2305        | 1166      | 0.32                  | 0.74     | 106.0          | 2  |
| 33 | Nyabikere    | Small | 0.4970        | 30.3285        | 1379      | 0.44                  | 0.98     | 40.1           | 2  |
| 34 | Nyaharia     | Small | 0.4990        | 30.2866        | 1447      | 0.03                  | 0.22     | 81.0           | 2  |
| 35 | Nyamiteza    | Small | 0.4356        | 30.2256        | 1259      | 0.30                  | 0.78     | 103.0          | 2  |
| 36 | Nyamusingire | Small | -0.2876       | 30.0301        | 981       | 4.0                   | 2.8      | 3.8            | 4  |
| 37 | Nyamusogani  | Small | 0.4241        | 30.2294        | 1223      | 0.10                  | 0.43     | 37.6           | 2  |
| 38 | Nyanswiga    | Small | 0.5065        | 30.2875        | 1469      | 0.033                 | 0.29     | 34.0           | 2  |
| 39 | Nyarayabana  | Small | 0.4291        | 30.2490        | 1189      | 0.11                  | 0.42     | 40.0           | 1  |
| 40 | Nyinabulitwa | Small | 0.5108        | 30.3242        | 1423      | 0.38                  | 0.97     | 61.7           | 2  |
| 41 | Rwankenzi    | Small | 0.4168        | 30.2710        | 1175      | 0.033                 | 0.28     | 12.0           | 2  |
| 42 | Rwebikere    | Small | 0.6876        | 30.2338        | 1576      | 0.078                 | 0.40     | 7.5            | 2  |
| 43 | Rwenjuba     | Small | 0.4415        | 30.2667        | 1251      | 0.22                  | 0.67     | 149.0          | 1  |
| 44 | Tumba        | Large | -0.7631       | 18.0334        | 290       | 765                   | 48.0     | 5.4            | 2  |
| 45 | Vert         | Small | -1.6119       | 29.1364        | 1469      | 0.20                  | 0.70     | 15.9           | 1  |
| 46 | Victoria     | Large | -1.0774       | 32.8391        | 1131      | 67,075                | 332.4    | 79.0           | 45 |

**Table S2:** Equations and statistics at 0.05 level of linear regressions given in Figures.

| Figure | Y vs X                                                         | Equation | b                 | a                | r <sup>2</sup> | P value | n   |
|--------|----------------------------------------------------------------|----------|-------------------|------------------|----------------|---------|-----|
| 2      | maximum depth vs log(surface area) "rest"                      | Y=a+bX   | 8.7340 ± 2.7400   | 18.8100 ± 5.3160 | 0.32           | 0.0043  | 24  |
| 3a     | log(MLD) vs log(MEL) all                                       | Y=a+bX   | 0.1968 ± 0.0708   | 0.5568 ± 0.0569  | 0.15           | 0.0080  | 46  |
| 3b     | log(MLD) vs log(Surface area) all                              | Y=a+bX   | 0.1036 ± 0.0363   | 0.5907 ± 0.0550  | 0.16           | 0.0065  | 46  |
| 3c     | log(MLD) vs log(MEL:maximum depth) * all                       | Y=a+bX   | -0.0464 ± 0.0617  | 0.6533 ± 0.0989  | 0.01           | 0.4564  | 46  |
| 3e     | log(PEA) vs log(MEL) all                                       | Y=a+bX   | -0.3567 ± 0.0921  | 1.0490 ± 0.0740  | 0.25           | 0.0004  | 46  |
| 3f     | log(PEA) vs log(Surface area) all                              | Y=a+bX   | -0.1777 ± 0.0479  | 0.9872 ± 0.0727  | 0.24           | 0.0006  | 46  |
| 3g     | log(PEA) vs log(MEL:maximum depth) * all                       | Y=a+bX   | -0.4849 ± 0.0695  | 0.3118 ± 0.1113  | 0.53           | <0.0001 | 46  |
| 5a     | log(Chl-a) vs log(bottom depth) * small lakes                  | Y=a+bX   | -0.7202 ± 0.1305  | 2.4050 ± 0.1997  | 0.31           | <0.0001 | 71  |
|        | log(Chl-a) vs log(bottom depth) * large lakes                  | Y=a+bX   | -0.4935 ± 0.1178  | 1.3680 ± 0.1599  | 0.16           | <0.0001 | 95  |
|        | log(Chl-a) vs log(bottom depth) * all lakes                    | Y=a+bX   | -0.4328 ± 0.1053  | 1.5870 ± 0.1510  | 0.09           | <0.0001 | 166 |
| 5b     | log(Chl-a) vs log(MLD) * small lakes                           | Y=a+bX   | -0.7416 ± 0.1356  | 1.7010 ± 0.0877  | 0.31           | <0.0001 | 70  |
|        | log(Chl-a) vs log(MLD) * large lakes                           | Y=a+bX   | -0.3754 ± 0.1280  | 1.1120 ± 0.1397  | 0.08           | 0.0042  | 95  |
|        | log(Chl-a) vs log(MLD) * all lakes                             | Y=a+bX   | -0.7056 ± 0.0831  | 1.5460 ± 0.0772  | 0.31           | <0.0001 | 165 |
| 5c     | log(Chl-a) vs log(PEA) * small lakes                           | Y=a+bX   | -0.4241 ± 0.1038  | 1.7680 ± 0.1197  | 0.19           | 0.0001  | 71  |
|        | log(Chl-a) vs log(PEA) * large lakes                           | Y=a+bX   | -0.0493 ± 0.0632  | 0.7392 ± 0.0563  | 0.01           | 0.3467  | 95  |
|        | log(Chl-a) vs log(PEA) * all lakes                             | Y=a+bX   | 0.0564 ± 0.0557   | 0.9691 ± 0.0563  | 0.01           | 0.3122  | 166 |
| 5d     | log(Chl-a) vs log(Zeu:MLD) * small lakes                       | Y=a+bX   | -0.6271 ± 0.2135  | 1.3460 ± 0.0701  | 0.12           | 0.0046  | 65  |
|        | log(Chl-a) vs log(Zeu:MLD) * large lakes                       | Y=a+bX   | -0.1838 ± 0.1887  | 0.6864 ± 0.0674  | 0.01           | 0.3326  | 93  |
|        | log(Chl-a) vs log(Zeu:MLD) * large lakes >20m                  | Y=a+bX   | -0.2921 ± 0.1177  | 0.5278 ± 0.0448  | 0.11           | 0.0165  | 52  |
|        | log(Chl-a) vs log(Zeu:MLD) * all lakes                         | Y=a+bX   | -0.0546 ± 0.1566  | 0.9727 ± 0.0541  | 0.00           | 0.7278  | 158 |
| 5b     | log(Chl-a) vs log(bottom NH4) * small lakes                    | Y=a+bX   | -0.1629 ± 0.0813  | 1.7110 ± 0.1980  | 0.06           | 0.0497  | 60  |
|        | log(Chl-a) vs log(bottom NH4) * large lakes                    | Y=a+bX   | 0.0872 ± 0.0678   | 0.6510 ± 0.0526  | 0.02           | 0.2021  | 87  |
|        | log(Chl-a) vs log(bottom NH4) * all lakes                      | Y=a+bX   | 0.1771 ± 0.0367   | 0.7644 ± 0.0612  | 0.14           | <0.0001 | 147 |
| 5b     | log(Chl-a) vs log(vertical DIN flux) * small lakes             | Y=a+bX   | -0.1451 ± 0.0599  | 1.4540 ± 0.0939  | 0.09           | 0.0185  | 61  |
|        | log(Chl-a) vs log(vertical DIN flux) * large lakes             | Y=a+bX   | 0.0789 ± 0.0396   | 0.8320 ± 0.0860  | 0.05           | 0.0501  | 79  |
|        | log(Chl-a) vs log(vertical DIN flux) * all lakes               | Y=a+bX   | 0.1170 ± 0.0252   | 1.0190 ± 0.0487  | 0.14           | <0.0001 | 140 |
| 6a     | log(bottom CH4) vs log(PEA) all                                | Y=a+bX   | 1.2620 ± 0.1302   | 3.1690 ± 0.1320  | 0.36           | <0.0001 | 168 |
|        | log(bottom CH4) vs log(PEA) depth < 20m                        | Y=a+bX   | 0.8381 ± 0.1790   | 3.1000 ± 0.1653  | 0.25           | <0.0001 | 67  |
|        | log(bottom CH4) vs log(PEA) depth > 20m                        | Y=a+bX   | 1.7500 ± 0.2331   | 2.7860 ± 0.2493  | 0.36           | <0.0001 | 101 |
| 6b     | log(bottom CH4) vs log(NH4+) all                               | Y=a+bX   | 1.2540 ± 0.0596   | 2.5590 ± 0.0990  | 0.75           | <0.0001 | 148 |
|        | log(bottom CH4) vs log(NH4+) depth < 20m                       | Y=a+bX   | 1.0800 ± 0.1271   | 2.4780 ± 0.1616  | 0.59           | <0.0001 | 53  |
|        | log(bottom CH4) vs log(NH4+) depth > 20m                       | Y=a+bX   | 1.2860 ± 0.0670   | 2.6170 ± 0.1236  | 0.80           | <0.0001 | 95  |
| 6c     | log(bottom CH4) vs log(MLD) all                                | Y=a+bX   | -1.2340 ± 0.2680  | 4.7330 ± 0.2494  | 0.11           | <0.0001 | 168 |
|        | log(bottom CH4) vs log(MLD) <20m                               | Y=a+bX   | -1.9260 ± 0.3636  | 4.0910 ± 0.2537  | 0.30           | <0.0001 | 67  |
|        | log(bottom CH4) vs log(MLD) >20m                               | Y=a+bX   | -1.9440 ± 0.3363  | 6.0710 ± 0.3555  | 0.25           | <0.0001 | 101 |
| 6d     | log(bottom CH4) vs log(PO43-) small lakes                      | Y=a+bX   | 0.7314 ± 0.1738   | 5.3550 ± 0.1725  | 0.23           | <0.0001 | 60  |
|        | log(bottom CH4) vs log(PO43-) large lakes                      | Y=a+bX   | 0.2635 ± 0.0923   | 2.1440 ± 0.1578  | 0.09           | 0.0054  | 88  |
| 6e     | log(bottom CH4) vs log(bottom depth) all                       | Y=a+bX   | 1.7940 ± 0.2931   | 1.3380 ± 0.4192  | 0.18           | <0.0001 | 168 |
|        | log(bottom CH4) vs log(bottom depth) small lakes               | Y=a+bX   | 2.2050 ± 0.2611   | 2.2920 ± 0.3971  | 0.50           | <0.0001 | 72  |
|        | log(bottom CH4) vs log(bottom depth) large lakes               | Y=a+bX   | 0.4352 ± 0.2072   | 1.9230 ± 0.2814  | 0.04           | 0.0384  | 96  |
| 6f     | log(bottom CH4) vs log(bottom O2) all                          | Y=a+bX   | -1.2570 ± 0.0551  | 5.1660 ± 0.0941  | 0.76           | <0.0001 | 168 |
|        | log(bottom CH4) vs log(bottom O2) <20m                         | Y=a+bX   | -1.6240 ± 0.1113  | 6.1010 ± 0.2288  | 0.77           | <0.0001 | 67  |
|        | log(bottom CH4) vs log(bottom O2) >20m                         | Y=a+bX   | -1.2810 ± 0.0741  | 5.0180 ± 0.1060  | 0.75           | <0.0001 | 101 |
| 66     | log(bottom CH4) vs log(Δbott-surf Sp Conductivity) all         | Y=a+bX   | 1.2000 ± 0.0526   | 3.0000 ± 0.0792  | 0.76           | <0.0001 | 168 |
|        | log(bottom CH4) vs log(Δbott-surf Sp Conductivity) depth < 20m | Y=a+bX   | 0.9228 ± 0.0942   | 2.8920 ± 0.1222  | 0.60           | <0.0001 | 67  |
|        | log(bottom CH4) vs log(Δbott-surf Sp Conductivity) depth > 20m | Y=a+bX   | 1.3280 ± 0.0612   | 2.9780 ± 0.0998  | 0.83           | <0.0001 | 101 |
| 6h     | log(bottom CH4) vs log(Chl-a) all                              | Y=a+bX   | 0.9398 ± 0.2206   | 2.8460 ± 0.2605  | 0.10           | <0.0001 | 166 |
|        | log(bottom CH4) vs log(Chl-a) depth < 20m                      | Y=a+bX   | 0.7433 ± 0.2344   | 2.1550 ± 0.3335  | 0.14           | 0.0023  | 66  |
|        | log(bottom CH4) vs log(Chl-a) depth > 20m                      | Y=a+bX   | 2.1500 ± 0.3414   | 2.4120 ± 0.3377  | 0.29           | <0.0001 | 100 |
| 8a     | log(surface CH4) vs bottom depth small lakes                   | Y=a+bX   | -0.0016 ± 0.0030  | 3.1230 ± 0.1774  | 0.00           | 0.5913  | 72  |
|        | log(surface CH4) vs bottom depth large lakes                   | Y=a+bX   | -0.0191 ± 0.0021  | 2.3970 ± 0.0734  | 0.47           | <0.0001 | 96  |
|        | log(surface CH4) vs bottom depth all lakes                     | Y=a+bX   | -0.0012 ± 0.0024  | 2.4100 ± 0.1144  | 0.00           | 0.6291  | 168 |
| 8c     | log(surface CH4) vs log(PEA) small lakes                       | Y=a+bX   | 0.2378 ± 0.1981   | 2.8180 ± 0.2273  | 0.02           | 0.2341  | 72  |
|        | log(surface CH4) vs log(PEA) large lakes                       | Y=a+bX   | -0.3320 ± 0.0570  | 1.8900 ± 0.0513  | 0.27           | <0.0001 | 96  |
|        | log(surface CH4) vs log(PEA) all lakes                         | Y=a+bX   | 0.1774 ± 0.0843   | 2.2830 ± 0.0854  | 0.03           | 0.0368  | 168 |
| 8e     | log(surface CH4) vs log(MLD) lakes < 20m                       | Y=a+bX   | -0.9318 ± 0.2287  | 3.0690 ± 0.1583  | 0.21           | 0.0001  | 66  |
|        | log(surface CH4) vs log(MLD) lakes > 20m                       | Y=a+bX   | -1.0320 ± 0.1799  | 3.1900 ± 0.1901  | 0.25           | <0.0001 | 101 |
|        | log(surface CH4) vs log(MLD) small lakes                       | Y=a+bX   | -0.2573 ± 0.2710  | 3.1580 ± 0.1843  | 0.01           | 0.3458  | 71  |
|        | log(surface CH4) vs log(MLD) large lakes                       | Y=a+bX   | -0.5005 ± 0.122   | 2.347 ± 0.1316   | 0.152          | <0.0001 | 96  |
|        | log(surface CH4) vs log(MLD) All lakes                         | Y=a+bX   | -0.8488 ± 0.1364  | 3.021 ± 0.1268   | 0.19           | <0.0001 | 167 |
| 8b     | log(surface CH4) vs log(Chl-a) lakes < 20m                     | Y=a+bX   | 0.4918 ± 0.1284   | 1.9820 ± 0.1826  | 0.19           | 0.0003  | 66  |
|        | log(surface CH4) vs log(Chl-a) lakes > 20m                     | Y=a+bX   | 1.2580 ± 0.1746   | 1.1330 ± 0.1728  | 0.35           | <0.0001 | 100 |
|        | log(surface CH4) vs log(Chl-a) small lakes                     | Y=a+bX   | 0.4276 ± 0.2041   | 2.4730 ± 0.2993  | 0.06           | 0.0398  | 71  |
|        | log(surface CH4) vs log(Chl-a) large lakes                     | Y=a+bX   | 0.4591 ± 0.09832  | 1.508 ± 0.08952  | 0.19           | <0.0001 | 95  |
|        | log(surface CH4) vs log(Chl-a) All lakes                       | Y=a+bX   | 0.7958 ± 0.1045   | 1.567 ± 0.1234   | 0.261          | <0.0001 | 166 |
| 8d     | log(surface CH4) vs log(bottom CH4) small lakes                | Y=a+bX   | 0.0004 ± 0.0000   | 10.3700 ± 5.4870 | 0.51           | <0.0001 | 72  |
|        | log(surface CH4) vs log(bottom CH4) large lakes                | Y=a+bX   | 0.1086 ± 0.0658   | 1.5860 ± 0.1735  | 0.03           | 0.1021  | 96  |
|        | log(surface CH4) vs log(bottom CH4) all lakes                  | Y=a+bX   | 0.0004 ± 0.0000   | 5.4360 ± 2.3340  | 0.52           | <0.0001 | 168 |
|        | log(surface CH4) vs log(bottom CH4) lakes <20m                 | Y=a+bX   | 0.0003 ± 0.0000   | 5.8910 ± 3.3450  | 0.70           | <0.0001 | 67  |
|        | log(surface CH4) vs log(bottom CH4) large lakes >20m           | Y=a+bX   | 0.0008 ± 0.0001   | 3.1230 ± 2.8340  | 0.49           | <0.0001 | 101 |
| 8f     | log(surface CH4) vs log(bottom O2) small lakes                 | Y=a+bX   | -0.6486 ± 0.1026  | 3.8000 ± 0.2109  | 0.38           | <0.0001 | 67  |
|        | log(surface CH4) vs log(bottom O2) large lakes                 | Y=a+bX   | -0.4277 ± 0.0667  | 2.4820 ± 0.0953  | 0.29           | <0.0001 | 101 |
|        | log(surface CH4) vs log(bottom O2) all lakes                   | Y=a+bX   | -0.0897 ± 0.1041  | 3.0570 ± 0.1185  | 0.01           | 0.3916  | 72  |
|        | log(surface CH4) vs log(bottom O2) lakes <20m                  | Y=a+bX   | 0.2751 ± 0.07613  | 1.335 ± 0.1546   | 0.122          | 0.0005  | 96  |
|        | log(surface CH4) vs log(bottom O2) large lakes >20m            | Y=a+bX   | -0.2985 ± 0.05395 | 2.699 ± 0.09207  | 0.156          | <0.0001 | 168 |

**Table S2 continued**

|     |                                                             |        |                  |                  |      |         |     |
|-----|-------------------------------------------------------------|--------|------------------|------------------|------|---------|-----|
| 9a  | log(surface CH4:Bottom CH4) vs bottom depth * small lakes   | Y=a+bX | -0.0165 ± 0.0038 | -1.7140 ± 0.2236 | 0.22 | <0.0001 | 72  |
|     | log(surface CH4:Bottom CH4) vs bottom depth * large lakes   | Y=a+bX | -0.0283 ± 0.0039 | 0.1763 ± 0.1366  | 0.36 | <0.0001 | 96  |
|     | log(surface CH4:Bottom CH4) vs bottom depth * all lakes     | Y=a+bX | -0.0256 ± 0.0031 | -0.5066 ± 0.1459 | 0.29 | <0.0001 | 168 |
| 9b  | log(surface CH4:Bottom CH4) vs MLD * small lakes            | Y=a+bX | -0.1328 ± 0.0424 | -1.8750 ± 0.2476 | 0.12 | 0.0025  | 71  |
|     | log(surface CH4:Bottom CH4) vs MLD * large lakes            | Y=a+bX | -0.0343 ± 0.0072 | -0.1039 ± 0.1422 | 0.19 | <0.0001 | 96  |
|     | log(surface CH4:Bottom CH4) vs MLD * all lakes              | Y=a+bX | 0.0076 ± 0.0104  | -1.4930 ± 0.1601 | 0.00 | 0.4649  | 167 |
| 9c  | log(surface CH4:Bottom CH4) vs log(PEA) * small lakes       | Y=a+bX | -1.6830 ± 0.2009 | -0.7924 ± 0.2306 | 0.50 | <0.0001 | 72  |
|     | log(surface CH4:Bottom CH4) vs log(PEA) * large lakes       | Y=a+bX | -0.4799 ± 0.1012 | -0.5771 ± 0.0911 | 0.19 | <0.0001 | 96  |
|     | log(surface CH4:Bottom CH4) vs log(PEA) * all lakes         | Y=a+bX | -1.0850 ± 0.0981 | -0.8852 ± 0.0994 | 0.42 | <0.0001 | 168 |
| 9d  | log(surface CH4:Bottom CH4) vs log(bottom O2) * small lakes | Y=a+bX | 0.8187 ± 0.1119  | -2.4910 ± 0.1274 | 0.43 | <0.0001 | 72  |
|     | log(surface CH4:Bottom CH4) vs log(bottom O2) * large lakes | Y=a+bX | 1.1280 ± 0.0736  | -2.7640 ± 0.1495 | 0.71 | <0.0001 | 96  |
|     | log(surface CH4:Bottom CH4) vs log(bottom O2) * all lakes   | Y=a+bX | 0.9584 ± 0.0486  | -2.4670 ± 0.0830 | 0.70 | <0.0001 | 168 |
| 9e  | log(surface CH4:Bottom CH4) vs log(FCH4) * small lakes      | Y=a+bX | 0.5090 ± 0.1560  | -3.9280 ± 0.4814 | 0.13 | 0.0017  | 72  |
|     | log(surface CH4:Bottom CH4) vs log(FCH4) * large lakes      | Y=a+bX | 0.6970 ± 0.1499  | -1.8230 ± 0.2729 | 0.19 | <0.0001 | 96  |
|     | log(surface CH4:Bottom CH4) vs log(FCH4) * all lakes        | Y=a+bX | -0.1657 ± 0.1147 | -1.0360 ± 0.1783 | 0.36 | <0.0001 | 168 |
| S3a | log(PEA) vs log (bottom depth) * small lakes                | Y=a+bX | 1.0360 ± 0.0999  | -0.5250 ± 0.1527 | 0.61 | <0.0001 | 70  |
|     | log(PEA) vs log (bottom depth) * large lakes                | Y=a+bX | 1.0590 ± 0.1825  | -1.2600 ± 0.2479 | 0.26 | <0.0001 | 96  |
|     | log(PEA) vs log (bottom depth) * all lakes                  | Y=a+bX | 1.1950 ± 0.1244  | -1.1490 ± 0.1783 | 0.36 | <0.0001 | 166 |
| S3b | log(PEA) vs log(MLD) * small lakes                          | Y=a+bX | -1.0890 ± 0.2571 | 0.5456 ± 0.1779  | 0.22 | <0.0001 | 66  |
|     | log(PEA) vs log log(MLD) * large lakes                      | Y=a+bX | -0.5709 ± 0.1209 | 1.3730 ± 0.1278  | 0.18 | <0.0001 | 101 |
|     | log(PEA) vs log log(MLD) * all lakes                        | Y=a+bX | -0.3010 ± 0.1392 | 0.7174 ± 0.1295  | 0.03 | 0.0321  | 167 |
| S4a | log(PEA) vs log(DOC) * small lakes                          | Y=a+bX | -0.8437 ± 0.2538 | 1.6250 ± 0.2036  | 0.14 | 0.0014  | 68  |
|     | log(PEA) vs log(DOC) * large lakes                          | Y=a+bX | -0.9355 ± 0.2799 | 0.6506 ± 0.1859  | 0.11 | 0.0012  | 89  |
|     | log(PEA) vs log(DOC) * all lakes                            | Y=a+bX | -0.4590 ± 0.2256 | 0.7909 ± 0.1640  | 0.03 | 0.0436  | 157 |
| S4b | log(PEA) vs log(a350) * small lakes                         | Y=a+bX | -0.9071 ± 0.1938 | 1.2930 ± 0.0849  | 0.26 | <0.0001 | 65  |
|     | log(PEA) vs log(a350) * large lakes                         | Y=a+bX | -0.5083 ± 0.1610 | 0.2216 ± 0.0984  | 0.10 | 0.0022  | 90  |
|     | log(PEA) vs log(a350) * all                                 | Y=a+bX | -0.5240 ± 0.1466 | 0.6256 ± 0.0799  | 0.08 | 0.0005  | 155 |
| S4c | log(MLD) vs log(DOC) * small lakes                          | Y=a+bX | -0.5627 ± 0.1923 | 0.9097 ± 0.1543  | 0.11 | 0.0047  | 68  |
|     | log(MLD) vs log(DOC) * large lakes                          | Y=a+bX | -0.4672 ± 0.1268 | 1.2810 ± 0.0842  | 0.14 | 0.0004  | 89  |
|     | log(MLD) vs log(DOC) * all                                  | Y=a+bX | -0.6881 ± 0.1152 | 1.2340 ± 0.0838  | 0.19 | <0.0001 | 157 |
| S4d | log(MLD) vs log(a350) * small lakes                         | Y=a+bX | -0.8016 ± 0.1429 | 0.7395 ± 0.0626  | 0.33 | <0.0001 | 65  |
|     | log(MLD) vs log(a350) * large lakes                         | Y=a+bX | -0.3235 ± 0.0709 | 1.1060 ± 0.0433  | 0.19 | <0.0001 | 90  |
|     | log(MLD) vs log(a350) * all                                 | Y=a+bX | -0.4469 ± 0.0769 | 0.9253 ± 0.0419  | 0.18 | <0.0001 | 155 |
| S6a | log(vertical FCH4) vs log(PEA) all                          | Y=a+bX | 1.2520 ± 0.1358  | 3.6420 ± 0.1319  | 0.24 | <0.0001 | 140 |
| S6b | log(vertical FDIN) vs log(PEA) all                          | Y=a+bX | 0.5509 ± 0.1299  | 1.5220 ± 0.1327  | 0.14 | <0.0001 | 113 |
| S6c | log(vertical delta_CH4) vs log(PEA) all                     | Y=a+bX | 1.9950 ± 0.1883  | 2.5810 ± 0.1830  | 0.45 | <0.0001 | 140 |
| S6d | log(vertical delta_DIN) vs log(PEA) all                     | Y=a+bX | 1.0450 ± 0.0943  | 0.6542 ± 0.0977  | 0.50 | <0.0001 | 126 |
| S6e | log(Kz) vs log(PEA) all                                     | Y=a+bX | -0.5170 ± 0.0456 | -5.9930 ± 0.0443 | 0.48 | <0.0001 | 140 |
| S7a | log(DOC) vs log(Chl-a) * small lakes (*)                    | Y=a+bX | 0.2830 ± 0.0436  | 0.3616 ± 0.0645  | 0.39 | <0.0001 | 67  |
|     | log(DOC) vs log(Chl-a) * large lakes (*)                    | Y=a+bX | 0.3248 ± 0.0417  | 0.2516 ± 0.0383  | 0.43 | <0.0001 | 83  |
|     | log(DOC) vs log(Chl-a) * all (*)                            | Y=a+bX | 0.3273 ± 0.0266  | 0.2728 ± 0.0319  | 0.51 | <0.0001 | 150 |
| S7b | log(a350) vs log(Chl-a) * small lakes (*)                   | Y=a+bX | 0.3849 ± 0.0479  | -0.2224 ± 0.0706 | 0.51 | <0.0001 | 65  |
|     | log(a350) vs log(Chl-a) * large lakes (*)                   | Y=a+bX | 0.5050 ± 0.0475  | -0.2932 ± 0.0436 | 0.59 | <0.0001 | 79  |
|     | log(a350) vs log(Chl-a) * all (*)                           | Y=a+bX | 0.4144 ± 0.0299  | -0.2397 ± 0.0359 | 0.57 | <0.0001 | 144 |
| S8  | log(bottom CH4) vs log (PEA) * PEA < 5                      | Y=a+bX | 0.3803 ± 0.1452  | 2.7310 ± 0.1168  | 0.08 | 0.0105  | 86  |
|     | log(bottom CH4) vs log (PEA) * 5 < PEA < 35                 | Y=a+bX | 4.7460 ± 0.9177  | -0.4211 ± 1.0120 | 0.29 | <0.0001 | 68  |
|     | log(bottom CH4) vs log (PEA) * PEA > 35                     | Y=a+bX | 1.2140 ± 1.3000  | 4.4430 ± 2.1100  | 0.08 | 0.3724  | 12  |
| S10 | bottom PO43- vs log(Ca2+:Na+) * small lakes                 | Y=a+bX | -5.0440 ± 2.4530 | 9.4460 ± 1.7770  | 0.10 | 0.0465  | 41  |
|     | bottom PO43- vs log(Ca2+:Na+) * large lakes                 | Y=a+bX | -0.2074 ± 0.5351 | 1.4540 ± 0.3671  | 0.00 | 0.6997  | 62  |
| S11 | MLD vs bottom lakes (small lakes)                           | Y=a+bX | 0.0503 ± 0.0095  | 2.2590 ± 0.5669  | 0.29 | <0.0001 | 71  |
|     | MLD vs bottom lakes (large lakes)                           | Y=a+bX | 0.3600 ± 0.0502  | 5.0070 ± 1.7650  | 0.35 | <0.0001 | 96  |
|     | MLD vs bottom lakes (all lakes)                             | Y=a+bX | 0.0816 ± 0.0269  | 7.7900 ± 1.2710  | 0.05 | 0.0028  | 167 |

(\*) excluding L. Mai Ndombe and Tumba

**Table S3:** Results of upaired two-tailed t-test with Welch's correction (t-statistic (t), degree of freedom (df), P value and corresponding summary, and sample size of each group (n1,n2)).

| Figure | Variable        | Groups         | t, df              | P value | Summary | n1 | n2 |
|--------|-----------------|----------------|--------------------|---------|---------|----|----|
| 3      | average MLD     | Large vs Small | t=6.070, df=43.51  | <0.0001 | ****    | 40 | 6  |
| 3      | average PEA     | Large vs Small | t=5.296, df=37.80  | <0.0001 | ****    | 40 | 6  |
| 4a     | log(PEA)        | Large vs Small | t=7.588, df=163.9  | <0.0001 | ****    | 72 | 96 |
| 4b     | log(MLD)        | Large vs Small | t=7.919, df=149.6  | <0.0001 | ****    | 71 | 96 |
| 4c     | log(surf CH4)   | Large vs Small | t=9.051, df=106.1  | <0.0001 | ****    | 72 | 96 |
| 4d     | log(bott CH4)   | Large vs Small | t=15.91, df=113.0  | <0.0001 | ****    | 72 | 96 |
| 4e     | log(surf NH4+)  | Large vs Small | t=2.563, df=153.4  | 0.0113  | *       | 67 | 91 |
| 4f     | log(bott NH4+)  | Large vs Small | t=14.08, df=106.8  | <0.0001 | ****    | 60 | 88 |
| 4g     | log(surf PO43-) | Large vs Small | t=1.145, df=100.6  | 0.2551  | ns      | 67 | 90 |
| 4h     | log(bott PO43-) | Large vs Small | t=4.412, df=80.21  | <0.0001 | ****    | 60 | 88 |
| S5a    | log(sp. Cond.)  | Large vs Small | t=4.356, df=161.3  | <0.0001 | ****    | 73 | 95 |
| S5b    | log(pH)         | Large vs Small | t=4.166, df=125.4  | <0.0001 | ****    | 42 | 90 |
| S5c    | log(Chl-a)      | Large vs Small | t=7.116, df=146.6  | <0.0001 | ****    | 72 | 95 |
| S5d    | log(DOC)        | Large vs Small | t=3.713, df=155.3  | 0.0003  | ***     | 69 | 89 |
| S5e    | log(a2350)      | Large vs Small | t=0.8251, df=146.4 | 0.4106  | ns      | 65 | 90 |

**Table S4:** Results of one-way analysis of variance (ANOVA) and Tukey's multiple comparisons test (F value, degree of freedom (DF) of treatment (between columns) (DFn) and of residual (within columns) (DFd), mean 1 and 2, mean and standard error (SE) of difference of means (diff.), n1, n2 Adjusted P value and corresponding summary as shown in figures), assuming a log-normal distribution (comparison of geometric means).

| Fig. | Variable tested | F (DFn, DFd)       | P value  | Tukey's multiple comparisons test | Mean 1  | Mean 2 | Mean±SE of diff. | n1 | n2 | Summary | Adj. P Value |
|------|-----------------|--------------------|----------|-----------------------------------|---------|--------|------------------|----|----|---------|--------------|
| S9   | bottom O2       | F (2, 165) = 72.62 | P<0.0001 | PEA < 5 vs. 5 < PEA < 35          | 79.180  | 2.484  | 31.880 ± 0.155   | 89 | 67 | ****    | <0.0001      |
|      |                 |                    |          | PEA < 5 vs. PEA > 35              | 481.600 | 0.164  | 481.600 ± 0.294  | 89 | 12 | ****    | <0.0001      |
|      |                 |                    |          | 5 < PEA < 35 vs. PEA > 35         | 15.110  | 0.164  | 15.110 ± 0.300   | 67 | 12 | ***     | 0.0004       |
